# Supplementary material for: Are standardized caries risk assessment models effective in assessing actual caries status and future caries increment? A systematic review
Source: BMC Oral Health. 2018 Jul 16;18:123. doi: 10.1186/s12903-018-0585-4 (PMC6048716; doi:10.1186/s12903-018-0585-4)
Supplement: Supplementary file 1 — List of papers excluded in the first selection (XLSX 54 kb) [file 12903_2018_585_MOESM1_ESM.xlsx]

## Sheet: papers
Authors	Year	Source	Reason for exclusion
Hernández Fernández et al.,	2017	European Archives of Paediatric Dentistry	Case report
Young et al.	2017	Journal of Dental Education	No caries data
Almasoud et al.	2016	Saudi Medical Journal	Research noise
Basha et al.	2016	Annals of Tropical Medicine and Public Health	No CRA data
Bhayade et al.	2016	Journal of Indian Society of Pedodontics and Preventive Dentistry	No CRA data
Bhayat et al.	2016	Eastern Mediterranean Health Journal	No CRA data
Bułdak et al.	2016	Experimental and Therapeutic Medicine	Study in vitro
Cadenas-Perula et al.	2016	American Journal of Orthodontics and Dentofacial Orthopedics	Review
Carvalho et al.	2016	Caries Research	Review
de la Vega et al.	2016	Journal of Psychosomatic Research	Research noise
de Silva et al.	2016	Cochrane Database of Systematic Reviews	Review
El Fadl et al.	2016	PLoS ONE	Review
Evans et al.	2016	Community Dentistry and Oral Epidemiology	No CRA data
FardAl et al.	2016	Journal of Clinical Periodontology	Resarch noise
Fontana et al.	2016	Journal of Dental Education	Resarch noise
Gartland et al.	2016	Archives of Women's Mental Health	Resarch noise
Gold et al.	2016	BMC Neurology	Resarch noise
Goolsby et al.	2016	Journal of Dental Education	No caries data
Hertel et al.	2016	European Journal of Clinical Microbiology and Infectious Diseases	Resarch noise
Holde et al.	2016	International Journal of Circumpolar Health	Resarch noise
Hu et al.	2016	Psychiatry Research	No CRA data
Jin et al.	2016	Annals of Applied Statistics	Resarch noise
Jones et al.	2016	NPJ Primary Care Researchpiratory Medicine	Resarch noise
Jordan et al.	2016	Swiss Dental Journal	Resarch noise
Knaś et al.	2016	Journal of Oral Pathology and Medicine	Resarch noise
Kramer et al.	2016	Acta Odontologica Scandinavica	No CRA data
Kueckelhaus et al.	2016	American Journal of Transplantation	Research noise
Kühnisch et al.	2016	European Archives of Paediatric Dentistry	Guidelines
Lee et al.	2016	Health Research Policy and System	Guidelines
Lin et al.	2016	Journal of Dental Sciences	No CRA data
Machura et al.	2016	Postepy Dermatologii i Alergologii	Resarch noise
Mills et al.	2016	General Dentistry	Review
Mirõ et al.	2016	European Journal of Pain (United Kingdom)	Resarch noise
Erika et al.	2016	Acta Stomatologica Croatica	Research noise
Naqshbandi Hayward et al.	2016	Health Research Policy and Systems	Resarch noise
Nelson et al.	2016	Journal of Psychosomatic Research	Resarch noise
Ng et al.	2016	Journal of the California Dental Association	Resarch noise
Oni et al.	2016	Rheumatology (United Kingdom)	Resarch noise
Özer et al.	2016	Kafkas Universitesi Veteriner Fakultesi Dergisi	Not in English
Patel et al.	2016	British Journal of Oral and Maxillofacial Surgery	Research noise
Perala and Bhupathiraju	2016	Journal of Clinical and Diagnostic Research	No caries and CRA data
Phillips et al.	2016	Community Dental Health	No CRA data
Pirani et al.	2016	Giornale Italiano di Endodonzia	Resarch noise
Priyanka et al.	2016	Journal of Clinical and Diagnostic Research	No CRA data
Rafatjou et al.	2016	Journal of Research in Health Sciences	No CRA data
Ren et al.	2016	Annals of Oncology	No CRA data
Rokicki et al.	2016	Clinical Hemorheology and Microcirculation	Resarch noise
Saini et al.	2016	Journal of Indian Society of Pedodontics and Preventive Dentistry	No CRA data
Schroth et al.	2016	Journal of Dental Research	No CRA data
Schwendicke et al.	2016	Journal of Dental Research	No caries and CRA data
SeethAlakshmi et al.	2016	Journal of Clinical and Diagnostic Research	No CRA data
Shah et al.	2016	Journal of Clinical and Diagnostic Research	Case report
Sharma et al.	2016	British Dental Journal	No caries and CRA data
Sichani et al.	2016	Dental Research Journal (Isfahan)	No CRA data
Solé et al.	2016	Clinical Journal of Pain	Resarch noise
Staberg et al.	2016	European Archives of Paediatric Dentistry	No caries data
Stratmeyer et al.	2016	Journal of Public Health Dentistry	No CRA data
Stratmeyer et al.	2016	Journal of Public Health Dentistry	No CRA data
Sudhapalli and SudhapAlli	2016	Journal of Clinical and Diagnostic Research	Resarch noise
Takeuchi et al.	2016	Annals of the Rheumatic Diseases	Research noise
Tomé-Pires et al.	2016	Scandinavian Journal of Pain	Resarch noise
Twetman et al.	2016	European Archives of Paediatric Dentistry	Review
Warren et al.	2016	International Journal of Technology Assessment in Health Care	Resarch noise
Watanabe et al.	2016	Journal of the California Dental Association	No CRA data
Williams et al.	2016	Journal of Physiotherapy	Resarch noise
Zane et al.	2016	American Journal of Clinical Dermatology	Resarch noise
Abduo et al.	2015	Computers in Biology and Medicine	Resarch noise
Akl et al.	2015	Systematic Reviews	Review
Akpinar et al.	2015	Acta Medica Mediterranea	Research noise
Aljafari et al.	2015	Trials	Resarch noise
Arino et al.	2015	Journal of Dentistry	No CRA data
Arrow et al.	2015	Community Dent Oral Epidemiol	No caries and CRA data
Balasundaram et al.	2015	Surgical and Radiologic Anatomy	Resarch noise
Barrach et al.	2015	Brazilian Journal of Otorhinolaryngology	Resarch noise
Broad et al.	2015	General Dentistry	Guidelines
Brown et al.	2015	Community Dentistry and Oral Epidemiology	No CRA data
Buldak et al.	2015	Journal of Physiology and Pharmacology	Resarch noise
Cakir et al.	2015	Journal of Esthetic and Researchtorative Dentistry	Resarch noise
Carrillo-Diaz et al.	2015	Community Dentistry and Oral Epidemiology	No CRA data
Castarlenas et al.	2015	Clinical Journal of Pain	Resarch noise
Chaffee et al.	2015	BMC Oral Health	No CRA data
Chambers et al.	2015	Journal of Dental Education	Resarch noise
Cheng et al.	2015	Journal of Dental Research	No CRA data
Chopra et al.	2015	North American Journal of Medical Sciences	No CRA data
Congrains et al.	2015	Geriatrics and Gerontology International	Resarch noise
Cubero et al.	2015	BMC Microbiology	Resarch noise
Cunha-Cruz et al.	2015	Trials	No caries and CRA data
Damyanova et al.	2015	Journal of IMAB: Annual Proceeding (Scientific Papers)	No caries and CRA data
De Marchi et al.	2015	Community Dentistry and Oral Epidemiology	No CRA data
Delgado et al.	2015	Journal of Dental Education	In vitro study
Deng et al.	2015	Oral Oncology	Review
Dorri et al.	2015	TheCochrane Database of Systematic Reviews	Review
Emekli-Alturfan et al.	2015	Annals of Clinical and Laboratory Science	Resarch noise
Erickson et al.	2015	Orbit	Resarch noise
Faraj et al.	2015	Journal of Clinical and Diagnostic Research	Resarch noise
Fernando et al.	2015	BMC Oral Health	No CRA data
Ferreira-Júnior et al.	2015	Community Dentistry and Oral Epidemiology	No caries and CRA data
Fraile-Bermúdez et al.	2015	Experimental Gerontology	Resarch noise
Frese et al.	2015	Scandinavian Journal of Medicine and Science in Sports	No caries and CRA data
Gassmann et al.	2015	Head and Face Medicine	Case report
Ghaeminia et al.	2015	Journal of Cranio-Maxillofacial Surgery	No caries and CRA data
Gnich et al.	2015	Community Dentistry and Oral Epidemiology	No caries and CRA data
Gracis et al.	2015	Journal of Feline Medicine and Surgery	Resarch noise
Gruen et al.	2015	PLoS ONE	Resarch noise
Haysom et al.	2015	Journal of Paediatrics and Child Health	No CRA data
Herndon et al.	2015	Journal of Pediatrics	Resarch noise
Hilgert et al.	2015	Journal of dental research	No CRA data
Iheozor-Ejiofor et al.	2015	TheCochrane Database of Systematic Reviews 6	Review
Ismail et al.	2015	Caries Research	No CRA data
Ivancevic et al.	2015	Computer Methods and Programs in Biomedicine	No caries and CRA data
Jackson	2015	Primary dental journal	No caries and CRA data
James et al.	2015	PLoS ONE	Resarch noise
Kakudate et al.	2015	Community Dentistry and Oral Epidemiology	No caries and CRA data
Kato et al.	2015	BMJ Open	No CRA data
Khanh et al.	2015	American Journal of Public Health	No CRA data
Kranz et al.	2015	Pediatrics	No CRA data
Krikken et al.	2015	Cleft Palate-Craniofacial Journal	Research noise
Kruger et al.	2015	Matern Child Health Journal	Research noise
Lim et al.	2015	Community Dentistry and Oral Epidemiology et A	No CRA data
Lino et al.	2015	International Dental Journal	No CRA data
Macey et al.	2015	Journal of Dental Research	Research noise
Makvandi et al.	2015	Journal of research in health sciences	Research noise
Mansuri and Shrestha	2015	Kathmandu University Medical Journal	Research noise
Krmek et al.	2015	Acta Stomatologica Croatica	No CRA data
Maru et al.	2015	Open Dentistry Journal	Review
Masoe et al.	2015	Adolescent Health, Medicine and Therapeutics	Research noise
Mata et al.	2015	Animals	Research noise
Gomes et al.	2015	Revista Portuguesa de Estomatologia, Medicina Dentaria e Cirurgia Maxilofacial	No CRA data
Mertz et al.	2015	Journal of Evidence-Based Dental Practice	Research noise
Miki et al.	2015	PLoS ONE	Research noise
Mori et al.	2015	Alzheimer's Research and Therapy	Research noise
Nakayama and Mori	2015	Journal of Epidemiology	No CRA data
Nakayama and Mori	2015	Journal of Public Health Dentistry	No CRA data
Niessen et al.	2015	PLoS ONE	Research noise
O'Sullivan et al.	2015	Community Dentistry and Oral Epidemiology	Research noise
OwadAlly et al.	2015	BMC Cancer	Research noise
Peres et al.	2016	Journal of Dental Research	No CRA data
Pine et al.	2015	Trials	No CraA data
Polk et al.	2015	Community Dent Oral Epidemiol	No CRA data
Pontes et al.	2015	European Journal of Orthodontics	Research noise
Reina et al.	2015	Journal of Oral Pathology and Medicine	Research noise
Ribeiro Filho et al.	2015	International Journal of Oral and Maxillofacial Surgery	Research noise
Riedy et al.	2015	Social Science and Medicine	Research noise
Robertson et al.	2015	Medical Physics	Research noise
Rossini et al.	2015	European Journal of Orthodontics	Review
Saleem et al.	2015	Journal of Postgraduate Medical Institute	Rearch noise
Saraithong et al.	2015	Clinical Oral Investigations	No CRA data
Sardana et al.	2015	Journal of Contemporary Dental Practice	Research noise
Sarracini et al.	2015	Pesquisa Brasileira em Odontopediatria e Clinica Integrada	No CRA data
Sbihi et al.	2015	Environmental Health Perspectives	Research noise
Si et al.	2015	Caries Research	No CRA data
Sitthisettapong et al.	2015	Caries Research	No CRA data
ten Dam et al.	2015	European Archives of Oto-Rhino-Laryngology	Resarch noise
Theocharopoulou et al.	2015	European Journal of Paediatric Dentistry	No CRA data
Tian et al.	2015	Biochemical and Biophysical Research Communications	No CRA data
Trottini et al.	2015	Caries Research	Review
Van Bilsen et al.	2015	British Journal of Oral and Maxillofacial Surgery	Resarch noise
Vazquez et al.	2015	BMC Oral Health	No CRA data
Veiga et al.	2015	PLoS ONE	No CRA data
Veloso et al.	2015	Revista Portuguesa de Estomatologia, Medicina Dentaria e Cirurgia Maxilofacial	Research noise
WAlsh et al.	2015	TheCochrane Database of Systematic Reviews 4	Review
Wang et al.	2015	Infectious Diseases of Poverty	Research noise
Wiener et al.	2015	Caries Research	No CRA data
Wong et al.	2015	Systematic Reviews	Review
Yokomichi et al.	2015	PLoS ONE	No CRA data
ŽAliuniene et al.	2015	Medicina	No CRA data
Abbate et al.	2014	European Journal of Paediatric Dentistry	No CRA data
Akl et al.	2014	Systematic Reviews	Review
Almosa et al.	2014	Angle Orthodontist	No CRA data
Almosa et al.	2014	Angle Orthodontist	No CRA data
Alston et al.	2014	Journal of the California Dental Association	Resarch noise
Alves et al.	2014	Caries Research	No caries and CRA data
Alves et al.	2014	Journal of dental research	No caries and CRA data
Aranibar Quiroz et al.	2014	Caries Research	No CRA data
Arheiam et al.	2014	International Dental Journal	No CRA data
Arora et al.	2014	Journal of Clinical Periodontology	Resarch noise
Ashrafioun et al.	2014	American Journal of Drug and Alcohol Abuse	Resarch noise
Bachanek et al.	2014	Przegl Lek	Resarch noise
Baginska et al.	2014	BMC Oral Health	No caries and CRA data
Batista et al.	2014	Health and Quality of Life Outcomes	No CRA data
Beerens et al.	2014	Acta Odontologica Scandinavica	No CRA data
Bellissimo-Rodrigues et al.	2014	Infect Control Hosp Epidemiol	Resarch noise
Benkaddour et al.	2014	Int Orthod	No caries and CRA data
Berg et al.	2014	Journal of the California Dental Association	Review
Bernabé et al.	2014	Journal of Dentistry	No CRA data
Bovali et al.	2014	American Journal of Orthodontics and Dentofacial Orthopedics	Resarch noise
Callesen et al.	2014	Indoor Air	Resarch noise
Campus et al.	2014	Clinical Oral Investigations	No caries and CRA data
Carta et al.	2014	Community Dental Health	No caries and CRA data
Carvalho et al.	2014	Brazilian Oral Research	Resarch noise
Chi et al.	2014	Journal of Dentistry for Children	No CRA data
Colterjohn et al.	2014	Journal of Arthroplasty	Resarch noise
Congiu et al.	2014	Journal of Public Health Dentistry	No caries and CRA data
Costacurta et al.	2014	European journal of paediatric dentistry	No CRA data
Cote et al.	2014	Pediatrics	Research noise
Coulthard et al.	2014	The Cochrane database of systematic reviews	Review
Cvikl et al.	2014	BMC Oral Health	No CRA data
Czarnecki et al.	2014	Journal of Dental Education	Resarch noise
D'Alessandro et al.	2014	European Journal of Paediatric Dentistry	No CRA data
Darmawikarta et al.	2014	Pediatrics	No caries and CRA data
De Souza et al.	2014	International Dental Journal	No caries and CRA data
Divaris et al.	2014	Journal Dent Research	Different outcome
Do et al.	2014	BMC public health	No caries and CRA data
Dos Santos et al.	2014	Journal of Dentistry	Resarch noise
Dos Santos Junior et al.	2014	BMC Oral Health	No CRA data
Dos Santos Junior et al.	2014	J Dent	No CRA data
Duijster et al.	2014	Community Dentistry and Oral Epidemiology	No CRA data
El Osta et al.	2014	Clinical Nutrition	No CRA data
Farokhi et al.	2014	Texas dental journal	Research noise
Fellows et al.	2014	American Journal of Dentistry	No caries and CRA data
Ferreira Zandoná et al.	2014	Journal of Dental Research	No CRA data
Ferro et al.	2014	European Journal of Paediatric Dentistry	No caries and CRA data
Fierro Monti et al.	2014	Revista de la Facultad de Ciencias Médicas	No CRA data
Fillmore et al.	2014	Journal of Oral and Maxillofacial Surgery	Research noise
Fontana et al.	2014	Journal of Dental Research	No CRA data
Fu et al.	2014	Journal of Dental Education	Research noise
Gaalaas et al.	2014	Oral Radiology	Research noise
Gaia et al.	2014	International Journal of Oral and Maxillofacial Surgery	Research noise
Gao et al.	2014	Pediatric dentistry	No CRA data
Gomes et al.	2014	Osteoporosis International	Research noise
Gomez et al.	2014	Community Dental Health	No CRA data
Gomez et al.	2014	European Archives of Paediatric Dentistry	No caries data
González-Del-Castillo-McGrath et al.	2014	Journal of Clinical and Experimental Dentistry	No CRA data
Govindaiah and Bhoopathi	2014	Journal of the American Dental Association	Research noise
Grippaudo et al.	2014	European journal of paediatric dentistry	Research noise
Guedes et al.	2014	Journal of Dental Research	No CRA data
Guzman-Armstrong et al.	2014	Journal of Dental Education	Research noise
Ha et al.	2014	BMJ Open	No CRA data
Ha et al.	2014	BMJ Open	No CRA data
Hayes et al.	2014	Dental Update	No caries and CRA data
Huang et al.	2014	PLoS ONE	No CRA data
Hurlbutt et al.	2014	Journal of Evidence-Based Dental Practice	Guidelines
Jakobson et al.	2014	Dentomaxillofac Radiol	Research noise
Jiang et al.	2014	New Zealand Medical Journal	Research noise
Kabakchieva et al.	2014	Journal of IMAB: Annual Proceeding (Scientific Papers)	No caries and CRA data
Kämppi et al.	2014	Community Dental Health	Research noise
Khazandi et al.	2014	Anaerobe	Research noise
Kobayashi et al.	2014	Journal of Periodontology	Search noise
Kutsch et al.	2014	Journal of Prosthetic Dentistry	Guidelines
Laccabue et al.	2014	Operative Dentistry	No caries data
Lallam et al.	2014	British Dental Journal	No caries and CRA data
Leiva-SAlinas et al.	2014	American Journal of Neuroradiology	Research noise
Lintula et al.	2014	BMC oral health	No caries and CRA data
Liu et al.	2014	International Journal of Environmental Research and Public Health	No caries and CRA data
Long et al.	2014	Pediatric dentistry	No caries and CRA data
Machale et al.	2014	Oral Health and Preventive Dentistry	No caries and CRA data
Majorana et al.	2014	BMC Pediatrics	No CRA data
Mannaa et al.	2014	Acta Odontologica Scandinavica	No CRA data
Mathur et al.	2014	BMJ Open	No CRA data
McNAlly et al.	2014	Gerodontology	No CRA data
Milgrom et al.	2014	Journal of the California Dental Association	Guidelines
Milona et al.	2014	Dental and Medical Problems	Research noise
Moore and Niemiec	2014	Journal of the American Animal Hospital Association	Research noise
Nascimento et al.	2014	Molecular Oral Microbiology	No CRA data
Neiva et al.	2014	Brazilian Journal of Oral Sciences	No caries and CRA data
Oenning et al.	2014	Journal of Oral and Maxillofacial Surgery	Research noise
Oliveira et al.	2014	Caries research	No CRA data
Orivuori et al.	2014	Clinical and Experimental Allergy	Research noise
Ortega et al.	2014	Age and Ageing	No caries and CRA data
Peltzer et al.	2014	International Journal of Environmental Research and Public Health	No CRA data
Phelan et al.	2014	PLoS ONE	No CRA data
Pujari et al.	2014	Journal of Oral Implantology	Research noise
Puliyel et al.	2014	Journal of the California Dental Association	Case report
Quinonez et al.	2014	BMC Oral Health	No caries and CRA data
Ramamurthy et al.	2014	Journal of Indian Society of Pedodontics and Preventive Dentistry	No caries and CRA data
Rechmann et al.	2014	Journal of Dental Education	No caries data
Reilly et al.	2014	Journal of Applied Microbiology	Research noise
Rocha et al.	2014	Community Dental Health	No caries and CRA data
Rothen et al.	2014	Community Dentistry and Oral Epidemiology	No CRA data
Salasa et al.	2014	Brazilian Journal of Oral Sciences	Research noise
Santos et al.	2014	International Journal of Paediatric Dentistry	No caries and CRA data
Santos et al.	2014	Journal of dentistry	No CRA data
Sardana et al.	2014	The journal of contemporary dental practice	Research noise
Sayyed et al.	2014	Journal of Maternal-Fetal and Neonatal Medicine	No caries and CRA data
Schroth et al.	2014	Pediatrics	No caries and CRA data
Schuler et al.	2014	Journal of Dentistry	Research noise
Schuller et al.	2014	Community Dentistry and Oral Epidemiology	No CRA data
Schwendicke et al.	2014	BMC oral health	No caries data
Schwendicke et al.	2014	PLoS ONE	Research noise
Serrant et al.	2014	Journal of Orthodontics	Research noise
Shinga-Ishihara et al.	2014	BMC Oral Health	No caries and CRA data
Sim et al.	2014	Journal of Pediatric Dentistry	Reccomandations
Smaïl-Faugeron et al.	2014	BMC Oral Health	Review
Söderström et al.	2014	BMC oral health	Research noise
Soltero-Rivera et al.	2014	Journal of Feline Medicine and Surgery	Research noise
Soxman et al.	2014	General Dentistry	No abstract
Špalj et al.	2014	Collegium Antropologicum	Research noise
Tapiainen et al.	2014	PLoS ONE	Research noise
Tay et al.	2014	Oral Surg Oral Med Oral Pathol Oral Radiol	Research noise
Taylor et al.	2014	Journal of Clinical Endocrinology and Metabolism	Research noise
Teanpaisan et al.	2014	Clinical Oral Investigations	No caries and CRA data
Teich et al.	2014	Journal of Dental Education	No caries and CRA data
Tellez et al.	2014	Journal of Evidence-Based Dental Practice	No abstract
Tikhonova et al.	2014	Caries Research	No CRA data
Tong et al.	2014	European Archives of Paediatric Dentistry	Research noise
Trivedi et al.	2014	Journal of Periodontology	Research noise
Tsitaishvili et al.	2014	Dental and Medical Problems	Research noise
Vahabi et al.	2014	Journal of Basic and Clinical Physiology and Pharmacology	In vitro study
Vargas et al.	2014	Journal of the American Dental Association	No caries and CRA data
Vargas-Ferreira et al.	2014	Journal of Dentistry	No CRA data
Vermaire et al.	2014	Caries Research	Different study design
West et al.	2014	Journal of Dentistry	Review
Wolf et al.	2014	Ophthalmology	Research noise
Wongkamhaeng et al.	2014	International Journal of Pediatric Otorhinolaryngology	No CRA data
Wyatt et al.	2014	Journal of the Canadian Dental Association	No caries and CRA data
Zhang et al.	2014	BMC Oral Health	Research noise
Zhao et al.	2014	BMC oral health	No caries and CRA data
Abukabbos et al.	2013	Saudi Dental Journal	Case report
Aframian et al.	2013	Oral Diseases	Research noise
Ahmad et al.	2013	Journal of dental hygiene	Research noise
Al-Ani et al.	2013	Clinical Oral Implants Research	Research noise
Alves et al.	2013	Community Dentistry and Oral Epidemiology	No caries and CRA data
Alyousef et al.	2013	European Journal of Dental Education	Research noise
Arredondo et al.	2013	Journal of Feline Medicine and Surgery	Research noise
Arrow et al.	2013	BMC Public Health	No caries and CRA data
Berg et al.	2013	Journal of Esthetic and Researchtorative Dentistry	No abstract
Bernades-Mayordomo et al.	2013	International Journal of Oral and Maxillofacial Surgery	Research noise
Bertaud-Gounot et al.	2013	BMC Psychiatry	No CRA data
Bonow et al.	2013	Brazilian Oral Research	No caries and CRA data
Braga et al.	2013	International Endodontic Journal	Research noise
BuzAlaf et al.	2013	Journal of Applied Oral Science	Research noise
Cannon et al.	2013	Journal of Clinical Pediatric Dentistry	No caries data
Carvalho et al.	2013	Journal of Oral and Maxillofacial Surgery	Research noise
Chaffee et al.	2013	Journal Dentist Research	Research noise
Chen et al.	2013	Dent Mater Journal	Research noise
Chen et al.	2013	Journal of the American Geriatrics Society	No CRA data
Cheon et al.	2013	European Journal of Oral Sciences	No caries and CRA data
Chi et al.	2013	Journal of the American Dental Association	No caries and CRA data
Christensen et al.	2013	Journal of the American Dental Association	Research noise
Corrêa-Faria et al.	2013	Brazilian Oral Research	No caries and CRA data
Cortellazzi et al.	2013	Oral Health and Preventive Dentistry	No CRA data
Cunha-Cruz et al.	2013	The Journal of the American Dental Association	Research noise
Dadvand et al.	2013	Environmental Health Perspectives	Research noise
Damm and Jones	2013	General Dentistry	Research noise
De Souza et al.	2013	Environmental Monitoring and Assessment	Research noise
Deery et al.	2013	British Dental Journal	No caries and CRA data
Delgado-Angulo et al.	2013	International Journal of Paediatric Dentistry	No CRA data
Demarco et al.	2013	Journal of Clinical Periodontology	No caries and CRA data
Deyu et al.	2013	AmJournal of Dentistry	Research noise
Dicus-Brookes et al.	2013	Journal of Oral and Maxillofacial Surgery	No caries and CRA data
Divaris et al.	2013	Caries Research	No CRA data
Drage and Davies	2013	Primary dental journal	Research noise
Dumas et al.	2013	Clinic Piediatric	Research noise
ElsAlhy et al.	2013	Journal of Dentistry	No CRA data
Evans et al.	2013	Journal of the Academy of Nutrition and Dietetics	Research noise
Ferreira-Zandoná et al.	2013	Journal of dental research	No CRA data
Fidalgo et al.	2013	Metabolomics	Different outcome
Figueiredo et al.	2013	Journal of Clinical Periodontology	Research noise
Filker et al.	2013	Journal of Dental Education	Research noise
Gao et al.	2013	Trials	Research noise
Garton et al.	2013	International Journal of Dental Hygiene	No caries and CRA data
Gerlach et al.	2013	Clinical Oral Implants Research	Research noise
Gomez et al.	2013	Journal of Dentistry	Research noise
Gonda et al.	2013	International Journal of Prosthodontics	Research noise
Greene et al.	2013	Dental Update	No caries and CRA data
Hallett et al.	2013	Australian Dental Journal	Guidelines
Hallett et al.	2013	Pediatric dentistry	No CRA data
Heaven et al.	2013	Journal of dentistry	No caries and CRA data
Heinrich-Weltzien et al.	2013	Clinical Oral Investigations	No CRA data
Hermont et al.	2013	International Journal of Eating Disorders	No CRA data
Holmén et al.	2013	BMC Oral Health	No CRA data
Holz et al.	2013	Probiotics and Antimicrobial Proteins	No caries and CRA data
Hom et al.	2013	Journal of the American Dental Association	Guidelines
Horiguchi et al.	2013	Molecular Oncology	Research noise
Iranzo-Cortés et al.	2013	Community Dental Health	No CRA data
Kabaktchieva et al.	2013	Journal of IMABAnnual Proceeding	Research noise
Kämppi et al.	2013	Caries Research	No CRA data
Kasaven et al.	2013	Cleft Palate-Craniofacial Journal	Research noise
Kateeb et al.	2013	Pediatric dentistry	No caries and CRA data
Khail et al.	2013	Medical Forum Monthly	Research noise
Kidd et al.	2013	Dental Update	Research noise
Kramer et al.	2013	Community Dentistry and Oral. Epidemiology	No caries and CRA data
Kulkarni et al.	2013	Caries Research	No CRA data
Kupietzky et al.	2013	Journal of Pediatric Dentistry	Research noise
Laitala et al.	2013	Community Dent Oral Epidemiol	No CRA data
Lala et al.	2013	Journal of Dental Education	Research noise
Lasfargues et al.	2013	British Dental Journal	No caries and CRA data
Leroy et al.	2013	International Journal of Paediatric Dentistry	No caries and CRA data
Levin et al.	2013	British Dental Journal	Research noise
Liétard et al.	2013	European Geriatric Medicine	Research noise
Liu et al.	2013	PLoS One	Research noise
Lombardo et al.	2013	ProgResearchs in Orthodontics	Research noise
Lopez-Cepero et al.	2013	Journal of Pediatric Dentistry	Research noise
Mäkinen et al.	2013	International Dental Journal	No caries and CRA data
Mal et al.	2013	Journal of the American Dental Association	Research noise
Manton et al.	2013	Australian Dental Journal	No caries and CRA data
Marinho et al.	2013	The Cochrane database of systematic reviews	Review
Martignon et al.	2013	Journal of Dental Education	Research noise
Martin et al.	2013	Operative dentistry	Research noise
Mateos-Moreno et al.	2013	Medicina Oral, Patologia Oral y Cirugia Bucal	No CRA data
Maupome et al.	2013	Journal of Dental Education	No caries and CRA data
Maxim et al.	2013	Revista medico-chirurgicalǎ̌ a Societǎ̌ţii de Medici ş̧i Naturaliş̧ti din Iaş̧i	No CRA data
McBride et al.	2013	Journal of Dentistry	Research noise
Mechelli et al.	2013	Candidate-Interactome	Research noise
Melo et al.	2013	Dentomaxillofacial Radiology	Research noise
Mickenautsch et al.	2013	PLoS ONE	Review
Migliaccio et al.	2013	Clinical Cases in Mineral and Bone Metabolism	Research noise
Milgrom et al.	2013	BMC Oral Health	No caries and CRA data
Muller-Bolla et al.	2013	Community Dentistry and Oral Epidemiology	Research noise
Nanayakkara et al.	2013	International Journal for Equity in Health	No CRA data
Nascimento et al.	2013	Journal of Clinical Periodontology	No CRA data
Nelson et al.	2013	Journal of Dental Research	No CRA data
Nwhator et al.	2013	East African medical journal	No caries and CRA data
Ostałowska et al.	2013	Pol Orthop Traumatol	Research noise
Padilla-Suzuki et al.	2013	Revista de Investigacion Clinica	Research noise
Pieper et al.	2013	Clinical Oral Investigations	No CRA data
Pimentel et al.	2013	Brazilian Oral Research	No CRA data
Pitchika et al.	2013	Journal Clin Pediatr Dent	No caries and CRA data
Pruna et al.	2013	BMC Musculoskeletal Disorders	Research noise
Püllen et al.	2013	Quintessence international	Research noise
Rajab et al.	2013	Oral Health and Preventive Dentistry	No CRA data
Reddy et al.	2013	Periodontology	Research noise
Reed et al.	2013	Experimental Brain Research	Research noise
Relvas et al.	2013	Medicina Oral, Patologia Oral y Cirugia Bucal	No CRA data
Ribeiro et al.	2013	International Journal of Paediatric Dentistry	No CRA data
Rouxel et al.	2013	British dental journal	No CRA data
Samec et al.	2013	International Journal of Paediatric Dentistry	No CRA data
Sánchez-Acedo et al.	2013	Medicina Oral, Patologia Oral y Cirugia Bucal	No CRA data
Sarumathi et al.	2013	Journal of Clinical and Diagnostic Research	Research noise
Shaffer et al.	2013	Community Dentistry and Oral Epidemiology	No CRA data
Singh et al.	2013	Community Dent Oral Epidemiol	No CRA data
Skoskiewicz-MAlinowska et al.	2013	Dental and Medical Problems	Research noise
Soukup et al.	2013	Journal of Small Animal Practice	Research noise
Srivastava et al.	2013	Southeast Asian Journal of Tropical Medicine and Public Health	No CRA data
Staufenbiel et al.	2013	European Journal of Clinical Nutrition	No CRA data
Syrjälä et al.	2013	Gerodontology	Research noise
Taipale et al.	2013	Caries Research	No CRA data
Tamošiunas et al.	2013	Stomatologija	No caries and CRA data
Tassery et al.	2013	Australian Dental Journal	Research noise
Teich et al.	2013	Journal of Dental Education	Research noise
Tennant et al.	2013	International Dental Journal	No CRA data
Townsend et al.	2013	Journal of Pediatric Dentistry	Research noise
Tsukinoki and Murakami	2013	European Journal of Epidemiology	Research noise
van de Sande et al.	2013	Journal of dental research	No caries and CRA data
Van Der Putten et al.	2013	European Geriatric Medicine	Review
Van Dijken et al.	2013	Dent Mater	No caries and CRA data
WAlsh et al.	2013	Australian Dental Journal	Research noise
Wennström et al.	2013	Acta Odontologica Scandinavica	Research noise
Weyant et al.	2013	Journal of the American Dental Association	No CRA data
Wong et al.	2013	Journal of the California Dental Association	No CRA data
Wright et al.	2013	Journal of the American Dental Association	No CRA data
Wu et al.	2013	Caries Research	No CRA data
Yokoyama et al.	2013	BMJ Open	Research noise
Zeng et al.	2013	Journal of Dental Research	Research noise
Zhang et al.	2013	BMC Oral Health	Research noise
Adegboye et al.	2012	Nutrition	Research noise
Arruda et al.	2012	Community Dentistry and Oral Epidemiology	No CRA data
Bakhshandeh et al.	2012	Clinical Oral Investigations	Research noise
Bansal et al.	2012	Journal of Contemporary Dental Practice	Research noise
Basinko et al.	2012	European Journal of Medical Genetics	Research noise
Batista et al.	2012	Brazilian Oral Research	No CRA data
Bauer et al.	2012	Journal of Cranio-Maxillofacial Surgery	Research noise
Beil et al.	2012	Medical Care	Research noise
Bernabeu et al.	2012	Malaria Journal	Research noise
Budenz et al.	2012	Journal of the California Dental Association	Research noise
Chamberlain et al.	2012	Physiological Measurement	Research noise
Chedid et al.	2012	Odonto-stomatologie tropicale	Research noise
Chen et al.	2012	Journal of the American Dental Association	Research noise
Cheng et al.	2012	Eur Arch Paediatr Dent	No CRA data
Chestnutt et al.	2012	BMC Oral Health	No CRA data
Clovis et al.	2012	Journal of dental hygiene	Research noise
Cruvinel et al.	2012	Journal of Applied Oral Science	Research noise
Cuneo et al.	2012	Technology in Cancer Research and Treatment	Research noise
De Souza et al.	2012	International Dental Journal	No CRA data
Decerle et al.	2012	Community Dental Health	No CRA data
Dye et al.	2012	Periodontology - (2000)	Research noise
Ellefsen et al.	2012	Gerodontology	Research noise
Ericson et al.	2012	Journal of Dental Research	No CRA data
Escudero-Vilaplana et al.	2012	Journal of Pharmacy and Pharmaceutical Sciences	Research noise
Featherstone et al.	2012	British Dental Journal	Research noise
Featherstone et al.	2012	Caries Research	No CRA data
Ferreira-Zandoná et al.	2012	Journal of Dental Research	No CRA data
Ferro et al.	2012	European Journal of Paediatric Dentistry	Research noise
Forns et al.	2012	Environment International	Research noise
Frazão et al.	2012	Brazilian Oral Research	No CRA data
Gaio et al.	2012	Gerodontology	Research noise
Gao et al.	2012	International Journal of Paediatric Dentistry	Research noise
Goettems et al.	2012	Caries Research	No CRA data
Gomes et al.	2012	Special Care in Dentistry	Research noise
Gordan et al.	2012	Journal of the American Dental Association	Research noise
Guerrieri et al.	2012	British Dental Journal	Research noise
Hadler-Olsen et al.	2012	European Journal of Orthodontics	No CRA data
Hebbal et al.	2012	International Journal of Collaborative Research on Internal Medicine and Public Health	Research noise
Hegde et al.	2012	Nitte University Journal of Health Science	Research noise
Hietala-Lenkkeri et al.	2012	International Journal of Paediatric Dentistry	Research noise
Huew et al.	2012	International Journal of Paediatric Dentistry	No CRA data
Ito et al.	2012	Journal of dental research	No CRA data
Jaindl et al.	2012	Injury	Research noise
Joosab et al.	2012	Journal of the South African Dental Association	Research noise
Kakudate et al.	2012	Journal of dental research	No CRA data
Kandelman et al.	2012	Periodontology - (2000)	Research noise
Kaur et al.	2012	Journal of Indian Society of Pedodontics and Preventive Dentistry	Research noise
Keightley et al.	2012	British dental journal	Research noise
Kneist et al.	2012	Quintessence International	No CRA data
Kornman et al.	2012	Journal of dental research	Research noise
Krawczyk et al.	2012	Dental and Medical Problems	Research noise
Krisdapong et al.	2012	International Dental Journal	Research noise
Kuper et al.	2012	Journal of Dentistry	Research noise
Laegreid et al.	2012	Acta odontologica Scandinavica	No CRA data
LaPointe et al.	2012	Journal of Pediatric Dentistry	No CRA data
Lauritano and Petruzzi	2012	Medicina Oral, Patologia Oral y Cirugia Bucal	No CRA data
Leandro-Merhi et al.	2012	Arquivos de Gastroenterologia	Research noise
Lenkkeri et al.	2012	Int J Paediatr Dent	No CRA data
Long et al.	2012	BMC Pediatrics	review
MacRitchie et al.	2012	Community Dentistry and Oral Epidemiology	No CRA data
Maharaj and Vayej	2012	Cardiovascular Journal of Africa	No caries data
Markovic et al.	2012	Vojnosanitetski Pregled	No CRA data
Martínez et al.	2012	Acta odontológica latinoamericana	No CRA data
Masood et al.	2012	BMC Public Health	No CRA data
McGrady et al.	2012	BMC Public Health	No CRA data
Meyer-Lueckel et al.	2012	Caries Research	No CRA data
Mitrakul et al.	2012	Southeast Asian Journal of Tropical Medicine and Public Health	Research noise
Molina-Frechero et al.	2012	Revista de Investigacion Clinica	No CRA data
Morant et al.	2012	Physica Medica	Research noise
Must et al.	2012	Obesity	Research noise
Nasrollahzadeh et al.	2012	British Journal of Cancer	Research noise
Nassar et al.	2012	Journal of the Canadian Dental Association	Research noise
Norberg et al.	2012	Community Dentistry and Oral Epidemiology	No CRA data
Ogawa et al.	2012	Gerodontology	Research noise
Pearse et al.	2012	The Lancet	Research noise
Pretty et al.	2012	BMC Public Health	Research noise
Ramos-Gomez et al.	2012	British Dental Journal	No CRA data
Rechmann et al.	2012	Compendium of continuing education in dentistry	Research noise
Rindal et al.	2012	Journal of Dentistry	Research noise
Ritter et al.	2012	Clinical Oral Investigations	No CRA data
Salazar et al.	2012	Carcinogenesis	Research noise
Samnieng et al.	2012	Community Dental Health	Research noise
Saw et al.	2012	Pakistan Journal of Nutrition	Research noise
Shearer et al.	2012	Community Dentistry and Oral Epidemiology	Research noise
Sitthisettapong et al.	2012	Journal of Dental Research	Research noise
Stewart et al.	2012	European Archives of Paediatric Dentistry	Review
Strömberg et al.	2012	BMC Oral Health	No CRA data
Takulla et al.	2012	The New York state dental journal	review
Tanaka et al.	2012	Nutrition Journal	Research noise
Tanner et al.	2012	Journal of Dental Research	Research noise
Tejo et al.	2012	Head and Face Medicine	Research noise
Thariat et al.	2012	Supportive Care in Cancer	Research noise
Turgut et al.	2012	Diagnostic and Interventional Radiology	Research noise
Twetman et al.	2012	Oralprophylaxe und Kinderzahnheilkunde	No CRA data
Ulusu et al.	2012	European Archives of Paediatric Dentistry	Research noise
van den Berg and Palmer	2012	Primary dental care : journal of the Faculty of General Dental Practitioners (UK)	Research noise
van Dijken and Pallesen	2012	Journal of Dentistry	Research noise
Vargas et al.	2012	Journal of Public Health Dentistry	No CRA data
Vergnes et al.	2012	PLoS ONE	No CRA data
Vieira et al.	2012	Caries Research	review
Vieira-Andrade et al.	2012	Brazilian Oral Research	No CRA data
Wan et al.	2012	Journal of Oral and Maxillofacial Surgery	Research noise
Wang et al.	2012	International Journal of Oral Science	No CRA data
Wen et al.	2012	Journal of Dental Research	No CRA data
Yankell et al.	2012	Journal of Clinical Dentistry	No Cra data
Yip et al.	2012	British Dental Journal	No CRA data
Zamora et al.	2012	Medicina Oral, Patologia Oral y Cirugia Bucal	Research noise
Adeniyi et al.	2011	Special Care in Dentistry	Research noise
AgrawAl et al.	2011	Journal of Oral Science	Research noise
Baca et al.	2011	Medicina Oral, Patologia Oral y Cirugia Bucal	No CRA data
Bankel et al.	2011	European Journal of Paediatric Dentistry	No CRA data
Berg et al.	2011	Journal of the American Dental Association	Research noise
Bernabé et al.	2011	Journal of Clinical Periodontology	Research noise
Bertrand et al.	2011	Journal of Public Health Dentistry	Research noise
Botelho et al.	2011	Caries Research	Research noise
Brukiene et al.	2011	Special Care in Dentistry	Research noise
Butura et al.	2011	Journal of Oral and Maxillofacial Surgery	Research noise
Campus et al.	2011	Caries Research	No CRA data
Cannell et al.	2011	British Dental Journal	Research noise
Carvalho et al.	2011	Caries Research	No CRA data
Carvalho et al.	2011	Journal of Oral and Maxillofacial Surgery	Research noise
Chankanka et al.	2011	Journal of Public Health Dentistry	No CRA data
Chen et al.	2011	International journal of oral science	Research noise
Chong et al.	2011	Journal of investigative and clinical dentistry	Research noise
Chung et al.	2011	Archives of Gerontology and Geriatrics	Research noise
Curtis et al.	2011	Australian Dental Journal	Research noise
Da Rosa et al.	2011	Community Dentistry and Oral Epidemiology	Research noise
Ditmyer et al.	2011	BMC Oral Health	No CRA data
Downer et al.	2011	Community Dental Health	Research noise
Durr and Ahmad	2011	Journal of the College of Physicians and Surgeons Pakistan	Research noise
Dye et al.	2011	Journal of the American Dental Association	No CRA data
El-Warrak et al.	2011	Journal of Small Animal Practice	Research noise
Estrela et al.	2011	Brazilian Dental Journal	Research noise
Estrela et al.	2011	Brazilian Dental Journal	Research noise
Featherstone et al.	2011	Journal of Prosthodontics	No CRA data
Ferraz et al.	2011	Brazilian Journal of Oral Sciences	Research noise
Fontana et al.	2011	Journal of Dental Research	No CRA data
Fontana et al.	2011	Journal of Dental Research	No CRA data
Frazao et al.	2011	BMC Oral Health	Research noise
Frisk et al.	2011	Acta odontologica Scandinavica	Research noise
Gormley et al.	2011	British Journal of Cancer	Research noise
Guido et al.	2011	International Journal of Paediatric Dentistry	Research noise
Hanioka et al.	2011	International Journal of Environmental Research and Public Health	Review
Harley et al.	2011	Journal of Comparative Pathology	Research noise
Hennet et al.	2011	Journal of Feline Medicine and Surgery	Research noise
Huang et al.	2011	Biometrics	Research noise
Ito et al.	2011	Journal of Dentistry	Research noise
Jacobsson et al.	2011	European Archives of Paediatric Dentistry	Research noise
Jones et al.	2011	Dentistry Today	Research noise
Keles et al.	2011	Peritoneal Dialysis International	Research noise
Kidd et al.	2011	Journal of Dentistry	No CRA data
Kirkevang et al.	2011	Caries Research	No CRA data
Lee et al.	2011	Journal of Endodontics	Research noise
Levine et al.	2011	Compendium of continuing education in dentistry	Research noise
Lucas et al.	2011	Australian Dental Journal	No CRA data
Madan et al.	2011	Indian Journal of Dental Research	Research noise
Maldupa et al.	2011	Stomatologija / issued by public institution	Research noise
Martin-Loeches et al.	2011	Intensive Care Medicine	Research noise
Mauthe and Eaton	2011	Primary dental care : journal of the Faculty of General Dental Practitioners (UK)	No CRA data
Mejàre et al.	2011	Dental update	No CRA data
Milgrom et al.	2011	Journal of the California Dental Association	No CRA data
Morou-Bermudez et al.	2011	Archives of Oral Biology	Research noise
Nanning et al.	2011	Journal of the International Academy of Periodontology	Research noise
Nowak et al.	2011	Journal of Dentistry	No CRA data
Ogat et al.	2011	Acta Medica Okayama	Research noise
Olley et al.	2011	British Dental Journal	Research noise
Parthasarathi et al.	2011	Journal of Oral and Maxillofacial Surgery	Research noise
Pitts et al.	2011	European Journal of Dental Education	No CRA data
Pitts et al.	2011	Journal of Dentistry	No CRA data
Plutzer et al.	2011	Child: care, health and development	No CRA data
Puttaiah et al.	2011	Journal of Contemporary Dental Practice	Research noise
Rai et al.	2011	Clinical Oral Investigations	No CRA data
Rajshekar et al.	2011	Journal of Indian Society of Pedodontics and Preventive Dentistry	No CRA data
Ramos-Gomez et al.	2011	Journal of the California Dental Association	No CRA data
Rethman et al.	2011	Journal of the American Dental Association	Research noise
Riley et al.	2011	Community Dentistry and Oral Epidemiology	No CRA data
Riley et al.	2011	Journal of the American Dental Association	Research noise
Robertson et al.	2011	American Journal of Orthodontics and Dentofacial Orthopedics	Research noise
Rodrigues et al.	2011	Periodontology - (2000)	No CRA data
Rosema et al.	2011	Journal of the International Academy of Periodontology	Research noise
Roza et al.	2011	Journal of Feline Medicine and Surgery	Research noise
Rugh et al.	2011	academic detailing	Research noise
Rwenyonyi et al.	2011	Clinical Oral Investigations	Research noise
Sánchez et al.	2011	Acta odontológica latinoamericana : AOL	Research noise
Sarmadi et al.	2011	International Journal of Paediatric Dentistry	No CRA data
Schulte et al.	2011	Caries Research	No CRA data
Seki et al.	2011	International Dental Journal	No CRA data
Shearer et al.	2011	Journal of Dental Research	No CRA data
Slawik et al.	2011	European Journal of Clinical Nutrition	Research noise
Srinagesh et al.	2011	Oral Health Prevention Dentistry	Research noise
Stokes et al.	2011	Caries Research	No CRA data
Strömberg et al.	2011	BMC oral health	No CRA data
Su et al.	2011	Foodborne Pathogens and Disease	Research noise
Tapias-Ledesma et al.	2011	Journal of Dentistry for Children	No CRA data
Teich et al.	2011	The Alpha omegan	No CRA data
Tellez et al.	2011	Journal of the American Dental Association	No CRA data
Thomson et al.	2011	European Journal of Oral Sciences	Research noise
Tongucx et al.	2011	Journal of Periodontology	Research noise
Trikaliotis et al.	2011	European Archives of Paediatric Dentistry	No CRA data
Tseveenjav et al.	2011	European Journal of Oral Sciences	Research noise
Vadiakas et al.	2011	European Archives of Paediatric Dentistry	No CRA data
van Dijken et al.	2011	Dental materials : official publication of the Academy of Dental Materials	Research noise
Vania et al.	2011	European Journal of Paediatric Dentistry	No CRA data
Vargas-Ferreira et al.	2011	Journal of Public Health Dentistry	No CRA data
Vergnes et al.	2011	Acta Odontologica Scandinavica	No CRA data
Vizzotto et al.	2011	Pediatric Dentistry	Research noise
Walter et al.	2011	European Journal of Oral Sciences	No CRA data
Weinstein et al.	2011	Journal of the California Dental Association	No CRA data
Werneck et al.	2011	Journal of Dental Research	Research noise
Yorty et al.	2011	Journal of Dental Education	No CRA data
Young et al.	2011	Journal of the California Dental Association	Research noise
Zhao et al.	2011	Community Dental Health	No CRA data
Ahluwalia et al.	2010	Gerodontology	Research noise
Al Mulla et al.	2010	World journal of orthodontics	No CRA data
Armfield et al.	2010	Journal of Public Health Dentistry	Research noise
Árnadóttir et al.	2010	Community Dental Health	No CRA data
Au et al.	2010	Journal of Biomedical Materials ResearchPart A	Research noise
Bader et al.	2010	BMC Oral Health	No CRA data
Bayat et al.	2010	Journal of Cranio-Maxillofacial Surgery	Research noise
Begzati et al.	2010	BMC Public Health	No CRA data
Berger et al.	2010	Clinical Oral Investigations	Research noise
Blattner et al.	2010	Journal of Endodontics	Research noise
Brickhouse et al.	2010	General Dentistry	Research noise
Cadavid et al.	2010	Brazilian Oral Research	Research noise
Cerqueira et al.	2010	Journal of Oral Pathology and Medicine	Research noise
Chaussain et al.	2010	Clinical Oral Investigations	No CRA data
Chaussain et al.	2010	Clinical Oral Investigations	No CRA data
Chi et al.	2010	Paediatric Anaesthesia	Research noise
Choudhary et al.	2010	Indian Journal of Public Health Research and Development	Research noise
Chung et al.	2010	Journal of the Canadian Dental Association	Research noise
Correa et al.	2010	Journal of Dental Research	Research noise
Costache et al.	2010	Revista medico-chirurgicala a Societatii de Medici si Naturalisti din Iasi	Research noise
Cressey et al.	2010	Journal of Public Health Dentistry	Research noise
Cruvinel et al.	2010	Brazilian Oral Research	No CRA data
Cruz et al.	2010	Journal of the American Dental Association	Research noise
Danhauer et al.	2010	J Am Acad Audiol	Research noise
DeWitte et al.	2010	American Journal of Physical Anthropology	Research noise
Dounis et al.	2010	Journal of Dental Education	Research noise
Fazilat et al.	2010	Pediatric dentistry	Research noise
Frencken et al.	2010	Journal of Dentistry	No CRA data
GonzAlez et al.	2010	Journal of Dental Education	Research noise
Gordan et al.	2010	Journal of the American Dental Association	Research noise
Hackmyer et al.	2010	Texas dental journal	Research noise
Harris et al.	2010	British Dental Journal	Research noise
Hong et al.	2010	Community Dental Health	Research noise
Hsu et al.	2010	Caries Research	No CRA data
Jackson et al.	2010	Journal of Dental Education	Research noise
Jones et al.	2010	Heart and Lung: Journal of Acute and Critical Care	Research noise
Julihn et al.	2010	European Journal of Oral Sciences	No CRA data
Kassawara et al.	2010	Journal of Applied Oral Science	No CRA data
Kaye et al.	2010	Journal of the American Geriatrics Society	Research noise
Laheij et al.	2010	Caries Research	Research noise
Lee et al.	2010	European archives of paediatric dentistry	Research noise
Lindouist et al.	2010	Swedish Dental Journal	No CRA data
Lorentz et al.	2010	Brazilian Oral Research	Research noise
Lundgren et al.	2010	General Dentistry	Research noise
Macintosh et al.	2010	Pediatric Dentistry	Research noise
Marshall et al.	2010	Pediatric Dentistry	Research noise
Mashoto et al.	2010	BMC Oral Health	No CRA data
McMahon et al.	2010	British Dental Journal	Research noise
McWhorter et al.	2010	Texas dental journal	Research noise
Mettes et al.	2010	Journal of Dentistry	Research noise
Meyer-Lueckel et al.	2010	Community Dentistry and Oral Epidemiology	Research noise
Miguel et al.	2010	Journal of Orthodontics	Research noise
Mizrahi et al.	2010	British Dental Journal	Research noise
Montero et al.	2010	Health and Quality of Life Outcomes	Research noise
Nittayananta et al.	2010	Journal of Oral Pathology and Medicine	Research noise
Opsahl Vital et al.	2010	International Orthodontics	Research noise
Ormond et al.	2010	Primary dental care : journal of the Faculty of General Dental Practitioners (UK) 17(4): 153-159.	Research noise
Ou-Yang et al.	2010	Pediatric Dentistry	Research noise
Oueis et al.	2010	Journal of Pediatric Dentistry	Research noise
Pakdaman et al.	2010	Australian Dental Journal	Research noise
Pardi et al.	2010	Oral health & preventive dentistry	No CRA data
Parisotto et al.	2010	Oral Health and Preventive Dentistry	Review
Pattussi et al.	2010	Community Dentistry and Oral Epidemiology	Research noise
Quock et al.	2010	Texas dental journal	Research noise
Ramos-Gomez et al.	2010	General Dentistry	Research noise
Ramos-Gomez et al.	2010	Journal of the California Dental Association	No CRA data
Ramos-Martinez et al.	2010	Revista de Salud Publica	Research noise
Rashkova and Toncheva	2010	Folia Medicaica	Research noise
Rethman et al.	2010	Journal of the American Dental Association	Research noise
Riley et al.	2010	Oral health & preventive dentist	Research noise
Riley et al.	2010	General Dentistry	Research noise
Riley et al.	2010	Community Dentistry and Oral Epidemiology	No CRA data
Riley et al.	2010	Journal of the American Dental Association	Research noise
Rindal et al.	2010	Journal of Dentistry	No CRA data
Ritter et al.	2010	Community Dentistry and Oral Epidemiology	Review
Rozier et al.	2010	Journal of the American Dental Association	Research noise
Salama et al.	2010	Journal of Pediatric Dentistry	Research noise
Sánchez-Pérez et al.	2010	Acta Odontologica Scandinavica	No CRA data
Sanpei et al.	2010	Angle Orthodontist	Research noise
Senpuku et al.	2010	Clinical laboratory	No CRA data
Sharma et al.	2010	AmJournal of Dentistry	Research noise
Shurman and Benedetto	2010	Clinics in Dermatology	Research noise
Siegal and Detty	2010	Journal of Public Health Dentistry	No CRA data
Siegal et al.	2010	Journal of Public Health Dentistry	No CRA data
Siegal et al.	2010	Journal of Public Health Dentistry	No CRA data
Silva et al.	2010	Revista Portuguesa de Estomatologia, Medicina Dentaria e Cirurgia Maxilofacial	Research noise
Taylor et al.	2010	Journal of Feline Medicine and Surgery	Research noise
Turner et al.	2010	British Dental Journal	No CRA data
Van Dijken et al.	2010	Dent Mater	Research noise
van Strijp et al.	2010	Nederlands tijdschrift voor tandheelkunde	Research noise
Vermaire et al.	2010	Community Dentistry and Oral Epidemiology	No CRA data
Viswanathan et al.	2010	Texas dental journal	Research noise
Wang et al.	2010	Community Dental Health	No CRA data
Warren et al.	2010	Value Health	Research noise
Wendell et al.	2010	Journal of Dental Research	Research noise
Zhong et al.	2010	Journal of Endodontics	Research noise
Zhu et al.	2010	Cleft Palate-Craniofacial Journal	Research noise
Zusman et al.	2010	Special Care in Dentistry	Research noise
Al-Omari et al.	2009	Journal of the Irish Dental Association	Research noise
Alaki et al.	2009	Pediatric Dentistry	No CRA data
Anggraeni	2009	International Dental Journal	Research noise
Avlund et al.	2009	Journal of the American Geriatrics Society	Research noise
Bailey et al.	2009	Journal of Dental Research	No CRA data
Bernabé et al.	2009	Community Dentistry and Oral Epidemiology	Research noise
Brown et al.	2009	Angle Orthodontist	Research noise
Campus et al.	2009	Caries Research	No CRA data
Caplan et al.	2009	Journal of the American Dental Association	Research noise
Chen et al.	2009	Journal of Clinical Rehabilitative Tissue Engineering Research	Research noise
Clarkson et al.	2009	Monographs in Oral Science	Guidelines
Corraini et al.	2009	Acta Odontologica Scandinavica	No CRA data
DeLaurier et al.	2009	Journal of Periodontal Research	Research noise
Dorfer et al.	2009	J Contemp Dent Pract	Research noise
Durand et al.	2009	Oral Diseases	No caries and CRA data
Eggertsson et al.	2009	Monographs in Oral Science	Review
Ellefsen et al.	2009	Journal of the American Dental Association	No CRA data
Encke et al.	2009	Journal of Oral Rehabilitation	Research noise
Evans et al.	2009	Australian Dental Journal	Review
Floyd	2009	American Journal of Physical Anthropology	No CRA data
Foek et al.	2009	J Adhes Dent	Research noise
Fonteles et al.	2009	Archives of Oral Biology	No CRA data
Foster et al.	2009	Community dental health	No CRA data
Gooch et al.	2009	Journal of the American Dental Association	Review
Gordan et al.	2009	Operative Dentistry	Research noise
Holliday et al.	2009	Molecular Pain	Research noise
Hong et al.	2009	Caries Research	No CRA data
Ismail et al.	2009	Journal of Dental Research	No CRA data
Jablonski-Momeni et al.	2009	Journal of Dentistry	In vitro study
Jigjid et al.	2009	Community Dental Health	No CRA data
Johanson et al.	2009	Acta Odontologica Scandinavica	No CRA data
Jonasson et al.	2009	Oral Surgery, Oral Medicine, Oral Pathology, Oral Radiology and Endodontology	Research noise
Jürgensen et al.	2009	BMC Oral Health	No CRA data
Kanagaratnam et al.	2009	Community Dentistry and Oral Epidemiology	No CRA data
Kumar et al.	2009	Brazilian Oral Research	Research noise
Loubele et al.	2009	European Journal of Radiology	Research noise
Lucas et al.	2009	Occupational Medicine	Research noise
Malcheff et al.	2009	Pediatric Dentistry	Research noise
Marshall	2009	Journal of the American Dental Association	Review
Maserejian et al.	2009	Community Dentistry and Oral Epidemiology	No CRA data
Mericske-Stern	2009	The International journal of prosthodontics	Research noise
Milgrom et al.	2009	Arch Pediatr Adolesc Med	No CRA data
Milicich	2009	Compendium of continuing education in dentistry	Review
Montero-Martin et al.	2009	Medicina Oral, Patologia Oral y Cirugia Bucal	Research noise
Namal et al.	2009	Eastern Mediterranean Health Journal	No CRA data
Nascimento et al.	2009	Oral Microbiology and Immunology	No CRA data
Ngoenwiwatkul and Leela-Adisorn	2009	Asia-Pacific Journal of Public Health	No CRA data
Nunn et al.	2009	Journal of Dental Research	No CRA data
Özeç et al.	2009	International Journal of Oral and Maxillofacial Surgery	No caries and CRA data
Parhar et al.	2009	Journal of Clinical Pediatric Dentistry	No CRA data
Peres et al.	2009	Community Dentistry and Oral Epidemiology	No CRA data
Pitts et al.	2009	Monographs in oral science	Review
Pobo et al.	2009	Chest	Research noise
Rai et al.	2009	Journal of Clinical Pediatric Dentistry	No CRA data
Rajendran et al.	2009	Indian Journal of Dental Research	Research noise
Reid et al.	2009	Healthcare Policy	Research noise
Roberts et al.	2009	Journal of Public Health Dentistry	No CRA data
Rudney et al.	2009	Archives of Oral Biology	Research noise
Sánchez et al.	2009	Acta odontológica latinoamericana	Research noise
Sánchez-Pérez et al.	2009	International Journal of Paediatric Dentistry	No CRA data
Sarmadi et al.	2009	International Journal of Paediatric Dentistry	No CRA data
Savage et al.	2009	Journal of Pediatric Dentistry	Research noise
Schroeder et al.	2009	Academic Medicine	Research noise
Schwartz et al.	2009	Journal of Dental Education	Research noise
Shigli et al.	2009	Gerodontology	No CRA data
Slack-Smith et al.	2009	Archives of Disease in Childhood	No caries and CRA data
Solinas et al.	2009	Community Dentistry and Oral Epidemiology	No CRA data
Šurdilovic et al.	2009	Acta Stomatologica Croatica	No CRA data
Swennen et al.	2009	International Journal of Oral and Maxillofacial Surgery	Research noise
Thind et al.	2009	Healthcare Policy	Research noise
Thomson et al.	2009	Community Dentistry and Oral Epidemiology	Research noise
Twetman et al.	2009	Monographs in Oral Science	Review
Vähänikkilä et al.	2009	Acta Odontologica Scandinavica	Review
Von Arx et al.	2009	Journal of Endodontics	Research noise
Xu et al.	2009	Quintessence international	No CRA data
Zehetbauer et al.	2009	European Journal of Oral Sciences	No CRA data
Zero et al.	2009	Journal of the American Dental Association	Review
Agueda et al.	2008	Journal of Clinical Periodontology	Research noise
Allen et al.	2008	Dental update	Research noise
Antunes et al.	2008	International Journal for Equity in Health 7.	Research noise
Ardenghi et al.	2008	Journal of Dentistry for Children	No CRA data
Autio-Gold et al.	2008	Journal of Dental Education	Research noise
Azrak et al.	2008	Schweizer Monatsschrift für Zahnmedizin	Research noise
Bader et al.	2008	Community Dentistry and Oral Epidemiology	No CRA data
Baskaradoss et al.	2008	Indian Journal of Dental Research	Research noise
Beauchamp et al.	2008	Journal of the American Dental Association	Research noise
Bin-Shuwaish et al.	2008	Journal of the American Dental Association	Research noise
Blumenshine et al.	2008	Journal of Public Health Dentistry	Research noise
Bradbury et al.	2008	British Journal of Nutrition	Research noise
Campus et al.	2008	Community Dental Health	No CRA data
Caspary et al.	2008	Pediatrics	Research noise
Chalmers et al.	2008	Dentistry Today	Research noise
Chawla et al.	2008	Eur Arch Paediatr Dent	Research noise
Cook et al.	2008	International Journal of Paediatric Dentistry	No CRA data
De Souza Barbosa et al.	2008	International Journal of Dermatology	Research noise
Ditmyer et al.	2008	Journal of Public Health Dentistry	No CRA data
Dunston et al.	2008	Journal of Pediatric Dentistry	Research noise
Ersin et al.	2008	Quintessence international	Research noise
Freire et al.	2008	Caries Research	No CRA data
Hague and Baechle	2008	Journal of dental hygiene : JDH / American Dental Hygienists' Association	Research noise
Ismail et al.	2008	Community dentistry and oral epidemiology	No CRA data
Ismail et al.	2008	Pediatric Dentistry	No CRA data
Jan et al.	2008	Environmental Toxicology and Pharmacology	Research noise
Jansson et al.	2008	Journal of Clinical Periodontology	Research noise
Julihn et al.	2008	Acta Odontologica Scandinavica	No CRA data
Jurić et al.	2008	Collegium Antropologicum	Research noise
Kervanto-Seppälä et al.	2008	International Journal of Paediatric Dentistry	Research noise
Lawrence et al.	2008	Community Dent Oral Epidemiology	Research noise
Leskinen et al.	2008	Acta Odontologica Scandinavica	Research noise
Leskinen et al.	2008	Journal of Dentistry	Research noise
Leskinen et al.	2008	Journal of Dentistry	Research noise
Lim et al.	2008	Journal of the American Dental Association	Research noise
Lin et al.	2008	American Journal of Orthodontics and Dentofacial Orthopedics	Research noise
Mazzoleni et al.	2008	European journal of paediatric dentistry	No CRA data
Mendes et al.	2008	Brazilian Journal of Oral Sciences	Research noise
Mettes et al.	2008	Journal of Dentistry	Research noise
MichAlowicz et al.	2008	The Journal of the American Dental Association	No CRA data
Minah et al.	2008	Pediatric Dentistry	No CRA data
Mulligan et al.	2008	Community Dentistry and Oral Epidemiology	No CRA data
Ng et al.	2008	Community Dentistry and Oral Epidemiology	Research noise
Niederman et al.	2008	Journal of the American Dental Association	Research noise
Nishimura et al.	2008	Journal of the American Dental Association	No CRA data
Oginni et al.	2008	Journal of Oral and Maxillofacial Surgery	Research noise
Oliva et al.	2008	Pediatric Emergency Care	Research noise
Oliveira et al.	2008	European Journal of Oral Sciences	Research noise
Otto et al.	2008	International Journal of Prosthodontics	Research noise
Piazzini et al.	2008	Epilepsy and Behavior	Research noise
Reisine et al.	2008	Community Dentistry and Oral Epidemiology	No CRA data
Roberts-Thomson et al.	2008	Australian Dental Journal	No CRA data
Robke et al.	2008	Journal of Orofacial Orthopedics	Research noise
Rogér et al.	2008	Journal of Dental Education	No CRA data
Sánchez-García et al.	2008	Gerodontology	Research noise
Santos and Douglass	2008	Journal of Pediatric Dentistry	Research noise
Sgan-Cohen et al.	2008	The Journal of Clinical Dentistry	No CRA data
Southward et al.	2008	Journal of Public Health Dentistry	No CRA data
Spencer et al.	2008	Community Dentistry and Oral Epidemiology	Research noise
Tadokoro et al.	2008	Anatomical Record	Research noise
Tavares et al.	2008	Journal of Dentistry for Children	No CRA data
TerezhAlmy et al.	2008	In tJournal of Dentistry Hyg	Research noise
Trueblood et al.	2008	Pediatric Dentistry	No CRA data
van Dijken and Pallesen	2008	Dent Mater	Research noise
Vollmer et al.	2008	Multiple Sclerosis	Research noise
Warren et al.	2008	Journal of Public Health Dentistry	No CRA data
Yee et al.	2008	Journal of Pediatric Dentistry	Research noise
Ahmed et al.	2007	International Dental Journal	No CRA data
Alm et al.	2007	Caries Research	No CRA data
Almeida et al.	2007	International Endodontic Journal	Research noise
Avsar et al.	2007	Oral Surgery, Oral Medicine, Oral Pathology, Oral Radiology and Endodontology	No CRA data
Ayo-Yusuf et al.	2007	Journal of Adolescent Health	No CRA data
Baelum et al.	2007	Journal of Oral Rehabilitation	Review
Bakke et al.	2007	Indoor Air	Research noise
Bellinger et al.	2007	Environmental Health Perspectives	Research noise
Bellinger et al.	2007	Journal of the American Dental Association	Research noise
Bhuridej et al.	2007	Journal of Public Health Dentistry	Research noise
Bissar et al.	2007	International Journal of Public Health	No CRA data
Blunck et al.	2007	Journal of Adhesive Dentistry	Research noise
Calderón et al.	2007	Journal of dental education	Research noise
Campus et al.	2007	Community Dental Health	No CRA data
Ccahuana-Vasquez et al.	2007	Brazilian Oral Research	Research noise
Chen et al.	2007	Journal of Endodontics	Research noise
Churchill et al.	2007	Journal of Public Health Dentistry	Research noise
Cretzmeyer et al.	2007	Journal of dentistry for children	Research noise
Dijken et al.	2007	Dental Materials	Research noise
Do et al.	2007	Journal of Dental Research	No CRA data
Elledge et al.	2007	Eur Arch Paediatr Dent	Research noise
Finlayson et al.	2007	Community Dentistry and Oral Epidemiology	No CRA data
GoyAl et al.	2007	Journal of Indian Society of Pedodontics and Preventive Dentistry	No CRA data
Harrison et al.	2007	Pediatr Dent	No CRA data
Helderman et al.	2007	Caries Research	No CRA data
Holm-Pedersen et al.	2007	Clinical Oral Implants Research	Review
Jonasson et al.	2007	BMC Infectious Diseases	No CRA data
Källestål et al.	2007	Swedish Dental Journal	No CRA data
Kirkevang et al.	2007	International Endodontic Journal	Research noise
Krämer et al.	2007	American Journal of Dentistry	In vitro study
Krustrup et al.	2007	Community Dental Health	No CRA data
Larsen et al.	2007	The New York state dental journal	No CRA data
Lopez et al.	2007	Journal de Pediatrie et de Puericulture	Not in English
Lovrov et al.	2007	Journal of Orofacial Orthopedics	No CRA data
Mariño et al.	2007	Australian Dental Journal	No CRA data
Meyer-Lueckel et al.	2007	Quintessence International	No CRA data
Monroy	2007	The Journal of the Michigan Dental Association	Review
Moss et al.	2007	Journal of Oral and Maxillofacial Surgery	No caries and CRA data
Neuhaus	2007	Lancet Oncology	Review
Neves et al.	2007	Journal of Clinical Pediatric Dentistry	Research noise
Newbrun	2007	Journal of the history of dentistry	Review
Nicolau et al.	2007	Community Dentistry and Oral Epidemiology	Review
Ollila et al.	2007	Acta Odontologica Scandinavica	No CRA data
Oscarson et al.	2007	Caries Research	No caries and CRA data
Ridell et al.	2007	Acta Odontologica Scandinavica	No CRA data
Ronco et al.	2007	British Medical Journal	Research noise
Saied-MoAllemi et al.	2007	Oral health & preventive dentistry	No CRA data
Sánchez-García et al.	2007	BMC Health Services Research	Research noise
Sandberg et al.	2007	Swedish Dental Journal	Review
Saxer et al.	2007	Schweiz Monatsschr Zahnmed	Not in English
Schluter et al.	2007	Journal of Public Health Dentistry	No caries and CRA data
Schroth et al.	2007	International journal of circumpolar health	No CRA data
Sohn et al.	2007	Journal of the American Dental Association	No CRA data
Stecksén-Blicks et al.	2007	Caries Research	No caries and CRA data
Steinberg	2007	Alpha Omegan	Review
Sukotjo et al.	2007	Journal of Dental Education	Research noise
Takeuchi et al.	2007	Nephrology	Research noise
Teanpaisan et al.	2007	International Dental Journal	No CRA data
TerezhAlmy et al.	2007	AmJournal of Dentistry	Research noise
Van Dijken et al.	2007	Dent Mater	Research noise
Van Dijken et al.	2007	Journal of Adhesive Dentistry	Research noise
Walker et al.	2007	Journal of Prosthodontics	Research noise
Walter et al.	2007	J Nucl Med	No CRA data
White et al.	2007	Journal of Oral and Maxillofacial Surgery	Review
Wiskott et al.	2007	Dental Materials	Research noise
Yang et al.	2007	BMC Public Health 7.	Research noise
Yankell et al.	2007	Journal of Clinical Dentistry	In vitro study
Yoshihara et al.	2007	Journal of Dental Research	No CRA data
Young et al.	2007	Journal of dental education	Review
Zhang et al.	2007	Journal of Dentistry	No CRA data
Al-Mutawa et al.	2006	Community Dental Health	No CRA data
Bartoloni et al.	2006	Journal of the American Dental Association	No caries and CRA data
Bartoloni et al.	2006	Journal of the American Dental Association	Research noise
Batchelor et al.	2006	BMC Oral Health	No CRA data
Besharati et al.	2006	International Journal of Ophthalmology	Research noise
Blackman et al.	2006	Gastroenterology	Research noise
Borutta et al.	2006	Gesundheitswesen	Not in English
Bradley and Oberg	2006	Alternative Medicine Review	Research noise
Brennan et al.	2006	Journal of the American Dental Association	Research noise
Byrappagari et al.	2006	Military Medicine	No CRA data
Chalmers	2006	Journal of the Canadian Dental Associationpart II	Review
Chalmers	2006	Journal of the Canadian Dental Association part I	Review
Chambers et al.	2006	Oral Oncology	Research noise
Chate et al.	2006	British Dental Journal	Research noise
Clarke et al.	2006	Pediatric Dentistry	No CRA data
Dahlén	2006	Acta Odontologica Scandinavica	Review
Davidson et al.	2006	Australian Dental Journal	No CRA data
DeRouen et al.	2006	Journal of the American Medical Association	Research noise
Enjary et al.	2006	Community Dentistry and Oral Epidemiology	No CRA data
Farrell et al.	2006	AmJournal of Dentistry	Research noise
Frisk et al.	2006	Acta Odontologica Scandinavica	Research noise
Hallett et al.	2006	Australian Dental Journal	No CRA data
Hill	2006	Journal of Oral and Maxillofacial Surgery	Review
Kopycka-Kedzierawski et al.	2006	Community Dentistry and Oral Epidemiology	No CRA data
Krustrup et al.	2006	Acta Odontologica Scandinavica	Research noise
Levy et al.	2006	Journal of Public Health Dentistry	Research noise
Loguercio et al.	2006	Journal of Oral Rehabilitation	Research noise
Mannai et al.	2006	Journal of Oral and Maxillofacial Surgery	Research noise
Martens et al.	2006	Quintessence International	No CRA data
Martignon et al.	2006	Caries Research	No caries and CRA data
Motohashi et al.	2006	Journal of oral science	No CRA data
Mumghamba et al.	2006	International journal of dental hygiene	No CRA data
Nainar and Straffon	2006	Journal of Dental Education	Research noise
Öhlund et al.	2007	Caries Research	No CRA data
Pattussi et al.	2006	Community Dentistry and Oral Epidemiology	No CRA data
Petti et al.	2006	Caries Research	No CRA data
Poulsen et al.	2006	Community Dentistry and Oral Epidemiology	No caries and CRA data
Prakash et al.	2006	Paediatrics and Child Health	Research noise
Ribeiro et al.	2006	Brazilian Dental Journal	Research noise
Riccelli et al.	2006	Dental Clinics of North America	Review
RindAl et al.	2006	Community Dentistry and Oral Epidemiology	No caries and CRA data
Rupf et al.	2006	European archives of paediatric dentistry	No CRA data
Schiff et al.	2006	Journal of Contemporary Dental Practice	Research noise
Slade et al.	2006	Australian Dental Journal	No caries and CRA data
Solomon et al.	2006	Journal of Dental Education	Research noise
Southward et al.	2006	Journal of Public Health Dentistry	No CRA data
Susin et al.	2006	Journal of Public Health Dentistry	Research noise
Tagliaferro et al.	2006	Journal of Public Health Dentistry	No CRA data
Tan et al.	2006	Singapore Dental Journal	Research noise
Tavener et al.	2006	Caries Research	Research noise
Tellez et al.	2006	Journal of Public Health Dentistry	No CRA data
Thavarajah et al.	2006	Archives of Oral Biology	Research noise
Thitasomakul et al.	2006	Community Dentistry and Oral Epidemiology	No CRA data
Tian et al.	2006	Journal of Biological Chemistry	Research noise
Vallejos-Sánchez et al.	2006	Journal of Dentistry	No CRA data
van Dijken and Sunnegårdh-Grönberg	2006	Journal of Dentistry	Research noise
Wawrzyniak et al.	2006	Family Medicine	Research noise
Wierchola et al.	2006	European Journal of Paediatric Dentistry	No CRA data
Wolfe et al.	2006	Journal of Pediatric Dentistry	No caries and CRA data
YlöstAlo et al.	2006	Journal of Clinical Periodontology	No CRA data
Zhan et al.	2006	Journal of Public Health Dentistry	Research noise
Zhang et al.	2006	Journal of Dentistry	No CRA data
Bader et al.	2005	Journal of Public Health Dentistry	No CRA data
Badovinac et al.	2005	Journal of Public Health Dentistry	No CRA data
Bedos et al.	2005	Journal of Dental Research	No CRA data
Berg et al.	2005	The Alpha omegan	No CRA data
Bittencourt et al.	2005	Acta Odontol Scand	Research noise
Casanova-Rosado et al.	2005	Acta Odontologica Scandinavica	No CRA data
Chadwick et al.	2005	Caries Research	Research noise
Chalmers et al.	2005	Special Care in Dentistry	Research noise
Chalmers et al.	2005	Special Care in Dentistry	Research noise
Corby et al.	2005	Journal of Clinical Microbiology	Research noise
Dalton Bittencourt et al.	2005	Acta Odontol Scand	Research noise
DeLaurier et al.	2005	Journal of Periodontology	Research noise
Donly et al.	2005	General Dentistry	No CRA data
Dos Santos et al.	2005	Acta Odontologica Scandinavica	Research noise
Ekstrand et al.	2005	Caries Research	No CRA data
Erdal et al.	2005	Environmental Health Perspectives	Research noise
Ferreira et al.	2005	International Journal of Paediatric Dentistry	Research noise
Flink et al.	2005	Archives of Oral Biology	Research noise
Fuks et al.	2005	The Alpha omegan	Research noise
Gabre et al.	2005	Caries Research	Research noise
Galaviz et al.	2005	Journal of Clinical Pediatric Dentistry	No CRA data
Grooms et al.	2005	Journal of Clinical Pediatric Dentistry	Research noise
Holm-Pedersen et al.	2005	Journal of the American Geriatrics Society	Research noise
Jacobsen et al.	2005	Journal of Contemporary Dental Practice	Research noise
Johansson et al.	2005	Swedish Dental Journal	No CRA data
KallestAl et al.	2005	Caries Research	Research noise
Karincaoglu et al.	2005	Journal of Oral Pathology and Medicine	Research noise
Kitchens et al.	2005	Journal of Contemporary Dental Practice	Review
Leroy et al.	2005	Caries Research	No CRA data
Locker et al.	2005	Canadian Journal of Public Health	Research noise
Manda et al.	2005	Statistical Methods in Medical Research	Research noise
Marthaler et al.	2005	Community Dentistry and Oral Epidemiology	No CRA data
Matear et al.	2005	Journal of The Royal Society for the Promotion of Health	Research noise
Moberg et al.	2005	Caries Research	Research noise
Morgan et al.	2005	Community Dental Health	No CRA data
Neely et al.	2005	Journal of Clinical Periodontology	Research noise
Perdigão et al.	2005	Journal of Adhesive Dentistry	Research noise
Piovano et al.	2005	Acta odontológica latinoamericana	Research noise
Primosch et al.	2005	Pediatric Dentistry	Research noise
Quiñonez et al.	2005	Journal of Public Health Dentistry	Research noise
Ramos-Gomez et al.	2005	Compendium of continuing education in dentistry	Research noise
Sasaki et al.	2005	Journal of Materials Science: Materials in Medicine	Research noise
Sauer et al.	2005	Altex	Research noise
Schiffner et al.	2005	Clinical Oral Investigations	Research noise
Schroth et al.	2005	Journal of the Canadian Dental Association	No CRA data
Schroth et al.	2005	Pediatric Dentistry	No CRA data
Sgan-Cohen and Vered	2005	The Journal of Clinical Dentistry	Research noise
Shulman et al.	2005	Caries Research	Research noise
Simecek et al.	2005	Journal of the American Dental Association	Research noise
Singh et al.	2005	Acta Cardiologica	Research noise
Tan and Santini	2005	The Journal of Clinical Dentistry16(1): 26-31.	Research noise
Tao et al.	2005	Antimicrobial Agents and Chemotherapy	Research noise
Terezhalmy et al.	2005	J Contemp Dent Pract	Research noise
Terezhalmy et al.	2005	Journal of Periodontology	Research noise
Tezal et al.	2005	Journal of Periodontology	Research noise
Tezal et al.	2005	Journal of Periodontology	Research noise
Van Dijken and Sunnegardh-Gronberg	2005	J Adhes Dent	Research noise
Weiss et al.	2005	Journal Orofacial Orthop	Research noise
Wennhall et al.	2005	Acta Odontologica Scandinavica	No CRA data
Willems et al.	2005	Family and Community Health	Research noise
Zhu et al.	2005	International Dental Journal	Research noise
Adut et al.	2004	Journal of Public Health Dentistry	Research noise
Al-Nozha et al.	2004	Saudi Medical Journal	Research noise
Aliyev et al.	2004	Biomaterials	Research noise
Amano et al.	2004	Journal of Dental Education	Research noise
Armfield et al.	2004	Community Dentistry and Oral Epidemiology	Research noise
Barsamian-Wunsch et al.	2004	Pediatric Dentistry	Research noise
Besseling et al.	2004	Cleft Palate-Craniofacial Journal	Research noise
Bhat and Rawat	2004	Indian Journal of Pediatrics	Research noise
Billings et al.	2004	Journal of Evidence-Based Dental Practice	Research noise
Bottenberg et al.	2004	Caries Research	No CRA data
Canakci et al.	2004	Australian and New Zealand Journal of Obstetrics and Gynaecology	Research noise
Copeland et al.	2004	Journal of Public Health Dentistry	Research noise
Davenport et al.	2004	International Journal of Paediatric Dentistry	Research noise
De Sant'Anna et al.	2004	Quintessence International	Research noise
Duschner et al.	2004	Journal of Clinical Dentistry	Research noise
Ellwood et al.	2004	Community Dent Oral Epidemiol	No CRA data
Fung et al.	2004	Australian Dental Journal	Research noise
García-Godoy et al.	2004	Am Journal of Dentistry	Research noise
Grau et al.	2004	Stroke	Research noise
Griffin et al.	2004	Journal of Public Health Dentistry	No CRA data
Heller et al.	2004	Journal of Public Health Dentistry	Research noise
Holst et al.	2004	Swedish Dental Journal	No CRA data
Imrey et al.	2004	Journal of dental research	Research noise
Kavvadia et al.	2004	Pediatric Dentistry	Research noise
Kirkevang et al.	2004	Oral Surgery, Oral Medicine, Oral Pathology, Oral Radiology, and Endodontics	Research noise
Kushnir et al.	2004	Journal of Public Health Dentistry	Research noise
Lizarelli et al.	2004	Photomedicine and Laser Surgery	Research noise
Locker et al.	2004	Journal of Public Health Dentistry	No CRA data
Mancl et al.	2004	Journal of dental research	No CRA data
Marinho et al.	2004	Evid Based Dent	Research noise
Okullo et al.	2004	International Journal of Paediatric Dentistry	Research noise
Paulander et al.	2004	Acta Odontologica Scandinavica	Research noise
Pereira et al.	2004	Brazilian oral research	Research noise
Pereira et al.	2004	Pesquisa odontologica brasileira = Brazilian oral research	Research noise
Phoenix et al.	2004	Journal of Prosthodontics	Research noise
Pienihäkkinen et al.	2004	Caries Research	No CRA data
Pretty et al.	2004	Journal of the Canadian Dental Association	No CRA data
Reid et al.	2004	Community Dentistry and Oral Epidemiology	No CRA data
Reiter et al.	2004	Advances in Small Animal Medicine and Surgery	Research noise
Ribeiro Pinto et al.	2004	Journal of Prosthetic Dentistry	Research noise
Sánchez-Pérez et al.	2004	Archives of Oral Biology	Research noise
Sarita et al.	2004	International Journal of Prosthodontics	Research noise
Sengun et al.	2004	Angle Orthodontist	Research noise
Sonis et al.	2004	Seminars in Orthodontics	Research noise
Stahl et al.	2004	Clinical oral investigations	Research noise
Travess et al.	2004	British Dental Journal	Research noise
Vachirarojpisan et al.	2004	Community Dentistry and Oral Epidemiology	No CRA data
Vanobbergen et al.	2004	Community Dent Oral Epidemiol	No CRA data
Vigolo et al.	2004	Journal of Prosthetic Dentistry	Research noise
Wang et al.	2004	Special Care in Dentistry	Research noise
Weinstein et al.	2004	The Journal of the American Dental Association	No CRA data
Wogelius et al.	2004	Community Dental Health	Research noise
Zimmer et al.	2004	American Journal of Orthodontic Dentofacial Orthop	Research noise
Antunes et al.	2003	International Dental Journal	no CRA data
Bader et al.	2003	Journal of the American Dental Association	No CRA data
Baelum et al.	2003	Community Dent Oral Epidemiology	no CRA data
Balmer et al.	2003	Cardiology in the Young	Research noise
Brackett et al.	2003	Operative Dentistry	Research noise
Brooks et al.	2003	Journal of the American Dental Association	no CRA data
Burt et al.	2003	Journal of Dental Research	Research noise
Campain et al.	2003	European Journal of Oral Sciences	Research noise
Chaffin et al.	2003	Journal of Dentistry for Children	Research noise
Davies et al.	2003	Community Dental Health	Research noise
Dorfer et al.	2003	Oral Health & Preventive Dentistry	Research noise
Dörfer et al.	2003	Oral Health & Preventive Dentistry	Research noise
Estafan et al.	2003	General Dentistry	Research noise
Grimoud et al.	2003	Journal of Oral Science	Research noise
Hardison et al.	2003	Pediatric Dentistry	no CRA data
Hayashi et al.	2003	Operative Dentistry	Research noise
Helminen et al.	2003	Community Dental Health	no CRA data
Hensel et al.	2003	Quintessence international	no CRA data
Honkala et al.	2003	International Journal of Paediatric Dentistry	no CRA data
Jokela et al.	2003	Acta Odontologica Scandinavica	no CRA data
Källestål et al.	2003	Caries Research	no CRA data
Kirkevang et al.	2003	Community Dentistry and Oral Epidemiology	Research noise
Kressin et al.	2003	Journal of Dental Research	Research noise
Levine et al.	2003	British Dental Journal	Research noise
Levy et al.	2003	Caries Research	no CRA data
Macek et al.	2003	Journal of public health dentistry	no CRA data
Maguire et al.	2003	British Dental Journal	no CRA data
Mariri et al.	2003	Community Dentistry and Oral Epidemiology	no CRA data
Marshall et al.	2003	Pediatrics	no CRA data
Mueller et al.	2003	Journal of dentistry for children	Research noise
Nicolau et al.	2003	Caries Research	no CRA data
Nyvad et al.	2003	Journal of Dental Research	no CRA data
Oscarson et al.	2003	Community Dent Oral Epidemiology	no CRA data
Paulander et al.	2003	Journal of Clinical Periodontology	Research noise
Peretz et al.	2003	Journal of Dentistry for Children	Research noise
Poorterman et al.	2003	Caries Research	no CRA data
Porteous et al.	2003	Journal of the American Dental Association	Research noise
Scarano et al.	2003	Journal of Endodontics	Research noise
Seki et al.	2003	Journal of Dentistry	no CRA data
Sgan-Cohen and Vered	2003	The Journal of Clinical Dentistry	Research noise
Shi et al.	2003	Journal of Clinical Pediatric Dentistry	No CRA data
Shiboski et al.	2003	Journal of Public Health Dentistry	Research noise
Soini et al.	2003	Special care in dentistry : official publication of the American Association of Hospital Dentists, the Academy of Dentistry for the Handicapped, and the American Society for Geriatric Dentistry	Research noise
Stenlund et al.	2003	Community Dentistry and Oral Epidemiology	No CRA data
Sturdevant et al.	2003	Journal of Prosthetic Dentistry	Research noise
Syrjälä et al.	2003	Caries Research	No CRA data
Takano et al.	2003	Community Dental Health	No CRA data
Tuominen et al.	2003	Journal of Dental Research	Research noise
Yankell et al.	2003	Journal of Clinical Dentistry	Research noise
Yoneda and Oda	2003	Internal Medicine	Research noise
Zhu et al.	2003	International Dental Journal	No CRA data
Aleksejuniene et al.	2002	Caries Research	No CRA data
Antunes et al.	2002	Community Dentistry and Oral Epidemiology	No CRA data
Åstrøm et al.	2002	BMC Oral Health	No CRA data
Atchison et al.	2002	Journal of Dental Education	Research noise
Baelum et al.	2002	Acta Odontologica Scandinavica	no CRA data
Batchelor et al.	2002	Community Dentistry and Oral Epidemiology	No CRA data
Benn et al.	2002	Journal of the American Dental Association	Research noise
Borutta et al.	2002	Journal of Clinical Dentistry	No CRA data
Brailsford et al.	2002	Journal of Dentistry	No CRA data
Casamassimo et al.	2002	Journal of Pediatric Dentistry	Research noise
Coulter et al.	2002	Journal of Evidence-Based Dental Practice	Research noise
Dentino et al.	2002	Journal of Periodontology	Research noise
Donly et al.	2002	Pediatric Dentistry	Research noise
Dos Santos et al.	2002	Special care in dentistry : official publication of the American Association of Hospital Dentists, the Academy of Dentistry for the Handicapped, and the American Society for Geriatric Dentistry	No CRA data
Foley et al.	2002	American Journal of Orthodontics and Dentofacial Orthopedics	Research noise
Forgie et al.	2002	Quintessence International	No CRA data
Friedlander et al.	2002	Journal of the American Dental Association	Research noise
Gilbert et al.	2002	Journal of Periodontology	Research noise
Gillet et al.	2002	The Journal of clinical pediatric dentistry	Research noise
Gorrel and Larsson	2002	Journal of Small Animal Practice	Research noise
Griffin et al.	2002	Journal of Dental Research	Research noise
Hallett et al.	2002	Community Dental Health	No CRA data
Härkänen et al.	2002	Journal of Dental Research	no CRA data
Heshmati et al.	2002	Journal of Prosthetic Dentistry	Research noise
Huntington et al.	2002	Pediatric Dentistry	No CRA data
Jansson et al.	2002	Journal of Clinical Periodontology	Research noise
Kalwitzki et al.	2002	International Journal of Paediatric Dentistry	no CRA data
Kettering et al.	2002	Journal of Contemporary Dental Practice	Research noise
Klichowska-PAlonka et al.	2002	Annales Universitatis Mariae Curie-Sklodowska Medicine	Research noise
Kumar et al.	2002	Community Dentistry and Oral Epidemiology	Research noise
Marcenes et al.	2002	Community dental health	Research noise
Mattila et al.	2002	Acta Odontologica Scandinavica	Research noise
Maupomé et al.	2002	European Journal of Dental Education	Research noise
Moon et al.	2002	Operative Dentistry	Research noise
Morse et al.	2002	Gerodontology	Research noise
Neumann and Nix	2002	Journal of Dental Education	Research noise
Newitter et al.	2002	Operative Dentistry	Research noise
Rajab et al.	2002	Community Dental Health	No CRA data
Reich et al.	2002	International Dental Journal	Research noise
Ribeiro Pinto et al.	2002	Journal of Prosthetic Dentistry	Research noise
Romero et al.	2002	Medicina Oral	Research noise
Rugarabamu et al.	2002	Community Dentistry and Oral Epidemiology	No CRA data
Sathyanarayanan et al.	2002	Indian journal of dental research : official publication of Indian Society for Dental Research	Research noise
Sayegh et al.	2002	Community Dental Health	No CRA data
Sharma et al.	2002	Journal of Clinical Dentistry	Research noise
Soxman et al.	2002	General dentistry	Research noise
Starr et al.	2002	Oral Microbiology and Immunology	Research noise
Stenlund et al.	2002	Journal of dental research	No CRA data
Stewart et al.	2002	Journal of public health dentistry	Research noise
Thomson et al.	2002	The Angle orthodontist	Research noise
Tickle et al.	2002	Community Dental Health	No CRA data
Tinanoff et al.	2002	Pediatric Dentistry	Research noise
Tinanoff et al.	2002	Pediatric Dentistry	No CRA data
Tseveenjav et al.	2002	European Journal of Dental Education	Research noise
Van Nieuwenhuysen et al.	2002	Acta Odontologica Scandinavica	Research noise
Zaura et al.	2002	Journal of Dental Research	Research noise
Banting et al.	2001	Journal of Dental Education	Research noise
Bardow et al.	2001	Archives of Oral Biology	Research noise
Bloch-Zupan et al.	2001	Caries Research	Research noise
Burt et al.	2001	Journal of Evidence-Based Dental Practice	Review
Cheung et al.	2001	International Journal of Oral and Maxillofacial Surgery	Research noise
Coulter et al.	2001	Journal of Evidence-Based Dental Practice	Research noise
Creedon et al.	2001	Community Dental Health	No CRA data
Dorfer et al.	2001	AmJournal of Dentistry	Research noise
Dörfer et al.	2001	AmJournal of Dentistry	Research noise
Euba et al.	2001	Gesundheitswesen	Research noise
Fors et al.	2001	Quintessence International	Research noise
Gabre et al.	2001	European Journal of Oral Sciences	Research noise
Hjern et al.	2001	Community Dentistry and Oral Epidemiology	Research noise
Honkala et al.	2001	Journal of Dental Research	Research noise
Jepson et al.	2001	British Dental Journal	Research noise
Kärkkäinen et al.	2001	Community Dental Health	No CRA data
Kukleva et al.	2001	Folia Medica	Research noise
Künzel et al.	2001	Journal of Evidence-Based Dental Practice	No CRA data
Lahti et al.	2001	International Dental Journal	Research noise
Lo Muzio et al.	2001	Experimental and Molecular Pathology	Research noise
MacKeown et al.	2001	South African Journal of Clinical Nutrition	Research noise
Mariño et al.	2001	Community Dentistry and Oral Epidemiology	Research noise
Maupomé et al.	2001	Community Dentistry and Oral Epidemiology	Research noise
Mejàre et al.	2001	Journal of Evidence-Based Dental Practice	No CRA data
Moalic et al.	2001	Caries Research	Research noise
Neely et al.	2001	Journal of Periodontology	Research noise
Oberländer et al.	2001	Clinical Oral Investigations	Research noise
Peters et al.	2001	Journal of Adhesive Dentistry	Research noise
Petersen et al.	2001	International Dental Journal	Research noise
Pinelli et al.	2001	Community Dentistry and Oral Epidemiology	No CRA data
Poulsen et al.	2001	Community Dental Health	No CRA data
Primosch et al.	2001	Journal of Dentistry for Children	Research noise
Quinonez et al.	2001	Pediatric Dentistry	Research noise
Reich et al.	2001	Caries Research	No CRA data
Reich et al.	2001	International Dental Journal	Research noise
Sánchez-Pérez et al.	2001	Archives of Oral Biology	Research noise
Scale et al.	2001	Pediatric Dentistry	Research noise
Shyama et al.	2001	Community Dental Health	No CRA data
Tassery et al.	2001	European Journal of Dental Education	Research noise
Terpenning et al.	2001	Journal of the American Geriatrics Society	Research noise
Van Palenstein Helderman et al.	2001	Caries Research	Research noise
Vanobbergen et al.	2001	Caries Research	No CRA data
Vanobbergen et al.	2001	Community dentistry and oral epidemiology	No CRA data
Watson et al.	2001	Journal of Public Health Dentistry	Research noise
Weintraub et al.	2001	Journal of dental education	No CRA data
Wendt et al.	2001	Acta Odontologica Scandinavica	No CRA data
Willershausen et al.	2001	European Journal of Medical Research	Research noise
Zero et al.	2001	Journal of Dental Education	Research noise
Aass and Gjermo	2000	Acta Odontol Scand	Research noise
Alanen et al.	2000	Acta Odontologica Scandinavica	Research noise
Banting et al.	2000	Gerodontology	Research noise
Baughan et al.	2000	Oral Microbiology and Immunology	Research noise
Brennan et al.	2000	Community Dentistry and Oral Epidemiology	Research noise
Burt et al.	2000	Journal of Dental Research	Research noise
Doifode et al.	2000	Indian Journal of Medical Sciences	Research noise
Downer et al.	2000	Dentomaxillofacial Radiology	Research noise
Fourrier et al.	2000	Intensive Care Med	Research noise
Gilbert et al.	2000	Caries Research	No CRA data
Hausen	2000	Community Dentistry and Oral Epidemiology	No CRA data
Hellström et al.	2000	Journal of Dental Research	Research noise
Hugoson et al.	2000	Community Dentistry and Oral Epidemiology	No CRA data
Hujoel et al.	2000	Journal of Periodontology	Research noise
Källestål et al.	2000	Swedish dental journal	No CRA data
Kanellis et al.	2000	Journal of Public Health Dentistry	Review
Kleinman et al.	2000	Dentistry today	Research noise
Kowash et al.	2000	British Dental Journal	No CRA data
Luan et al.	2000	Caries Research	No CRA data
Manila et al.	2000	Journal of Dental Research	Research noise
Merte et al.	2000	Journal of Biomedical Materials Research	Research noise
Powell et al.	2000	Journal of Public Health Dentistry	No CRA data
Rethman et al.	2000	Journal of the American Dental Association	Review
Slade et al.	2000	Community Dentistry and Oral Epidemiology	Different outcome
Van Dijken et al.	2000	Journal of Dentistry	Research noise
Walls et al.	2000	European Journal of Oral Sciences	Research noise
Wandera et al.	2000	Journal of Dentistry for Children	No CRA data
Wassell et al.	2000	Journal of Dentistry	No CRA data
White et al.	2000	Journal of the American Dental Association	No CRA data
Zavras et al.	2000	Journal of Public Health Dentistry	No CRA data
Zickert et al.	2000	British Dental Journal	Research noise

## Sheet: reason 
		The following reasons for exclusion were provided:
		Review, Guidelines, Case report (exclusion criteria)
		Not in English (exclusion criteria)
		Research noise (when papers were not related to caries risk)
		No caries or CRA data (when paper was related to caries risk, but not data on both outcomes -caries and standardized CRA- were present)
		No caries data (when paper was related to caries risk and CRA data were reported, but not data on caries were available)
		No CRA data (when paper was related to caries risk and caries data were reported, but not data on CRA recorded using standardized CRA models were available)
