# Supplementary material for: Are standardized caries risk assessment models effective in assessing actual caries status and future caries increment? A systematic review
Source: BMC Oral Health. 2018 Jul 16;18:123. doi: 10.1186/s12903-018-0585-4 (PMC6048716; doi:10.1186/s12903-018-0585-4)
Supplement: Supplementary file 2 — List of papers excluded in the second selection (XLSX 11 kb) [file 12903_2018_585_MOESM2_ESM.xlsx]

## Sheet: Foglio1
Authors	Year	Source	Reason for exclusion
Karabekiroğlu and Ünlü	2017	International Dental Journal	No analysis between caries risk and caries clinical data
Dias et al.	2017	Acta Odontologica Scandinavica	No analysis between caries risk and caries clinical data
Taqi et al.	2017	Pak J Med Sc	No analysis between caries risk and caries clinical data
Freitas et al.	2016	Brazilian Research in pediatric dentistry and integrated Clinic	No caries indices
Gauba et al.	2016	Journal of Clinical Pediatric Dentistry	No analysis between caries risk and caries clinical data
Madhu et al.	2016	Journal indian Soc Pedod Prev Dent	No caries indices
Petersson et al.	2016	BMC Oral Health	No analysis between caries risk and caries clinical data
Chaffee et al.	2015	Journal of Dental Education	No caries indices
Domejean et al.	2015	Journal of Dental Education	No caries indices
Alves et al.	2014	Journal of Dental Research	No association between CRA and caries activity
Daryani et al.	2014	Journal of Clinical and Diagnostic Research	Cariogram data related to sistematic disease and no analysis between caries risk and caries clinical data
Gaudilliere et al.	2014	Journal of Craniofacial Surgery	No caries indices
Petsi et al.	2014	Angle orthodontist	No analysis between caries risk and caries clinical data
Fadel et al.	2013	Journal of Periodontology	Cariogram data related to sistematic disease and no analysis between caries risk and caries clinical data
Hänsel Petersson et al.	2013	Acta Odontol Scand	No caries indices
Wennerholm et al.	2013	European Journal of Oral Science	No Caries indices reported and no analysis between caries risk and caries clinical data
Yoon et al.	2012	Journal of the American Dental Association	No Caries indices reported and no analysis between caries risk and caries clinical data
Doméjean et al.	2011	Journal of the California Dental Association	No analysis between caries risk and caries clinical data
Fadel et al.	2011	Acta Odontologica Scandinavica	No Caries indices reported
Fadel et al.	2011	Journal of Periodontology	Cariogram data related to sistematic disease and no analysis between caries risk and caries clinical data
Oter et al.	2011	Caries Research	No Caries indices reported
Patil et al.	2011	Community Dental Health	Cariogram data related to sistematic disease and no analysis between caries risk and caries clinical data
Merdad et al.	2010	Oral Surgery Oral Medicine Oral Pathology Oral Radiology and Endodontology	No Caries indices reported
Sonbul et al.	2010	Acta Odontologica Scandinavica	No Caries indices reported
Stensson et al.	2010	Caries Research	Cariogram data related to sistematic disease and no analysis between caries risk and caries clinical data
Utreja et al.	2010	International Dental Journal	No analysis between caries risk and caries clinical data
Amila et al.	2007	International Dental Journal	No Caries indices reported
Stecksén-Blicks et al.	2007	Oral health & preventive dentistry	No Caries indices reported
Alian et al.	2006	Journal of the Canadian Dental Association	Report of 3 clinical cases
